# Supplementary material for: Symptomatic Non-stenotic Carotid Disease in Embolic Stroke of Undetermined Source: Analysis of the ESCAPE-NA1 Trial
Source: PubMed Central journal article supplement (PMC11130033; doi:10.1007/s00062-023-01365-0), 2023-12-18
Supplement: 62_2023_1365_MOESM1_ESM.pdf [file 62_2023_1365_MOESM1_ESM.pdf]

**SYMPTOMATIC NON-STENOTIC CAROTID DISEASE IN EMBOLIC STROKE OF  
UNDETERMINED SOURCE – ANALYSIS OF THE ESCAPE-NA1 TRIAL**

**FIGURES:**

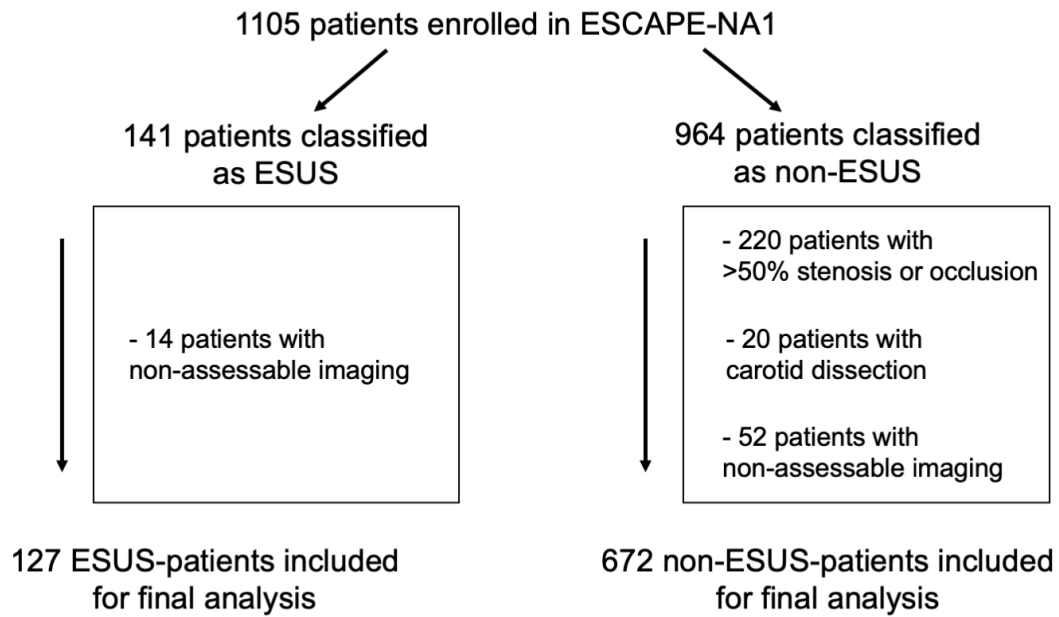

**Online Resource – Figure 1: Patient flowchart**

## TABLES

| <b>Online Resource - Table 1: Baseline characteristics for patients with ESUS compared to patients with Non-ESUS</b>                                                                                                                        |                            |                                |                  |
|---------------------------------------------------------------------------------------------------------------------------------------------------------------------------------------------------------------------------------------------|----------------------------|--------------------------------|------------------|
|                                                                                                                                                                                                                                             | ESUS-Patients<br>(n = 127) | Non-ESUS Patients<br>(n = 672) | p-Value          |
| Age, median (IQR)                                                                                                                                                                                                                           | 63.9 (54.7-74.3)           | 73.8 (63.3-81.8)               | <b>&lt;0.001</b> |
| Female sex, n (%)                                                                                                                                                                                                                           | 62 (48.8)                  | 373 (54.3)                     | 0.175            |
| Baseline NIHSS, median (IQR)                                                                                                                                                                                                                | 17 (13-21)                 | 17 (12-21)                     | 0.935            |
| <b>Medical history</b>                                                                                                                                                                                                                      |                            |                                |                  |
| Hypertension, n (%)                                                                                                                                                                                                                         | 71 (55.9)                  | 503 (74.9)                     | <b>&lt;0.001</b> |
| Diabetes, n (%)                                                                                                                                                                                                                             | 23 (18.1)                  | 142 (21.1)                     | 0.819            |
| Prior stroke/TIA, n (%)                                                                                                                                                                                                                     | 21 (16.5)                  | 98 (14.6)                      | 0.587            |
| Recent stroke/TIA, n (%)                                                                                                                                                                                                                    | 8 (6.3)                    | 20 (3.0)                       | 0.069            |
| Hyperlipidemia, n (%)                                                                                                                                                                                                                       | 52 (41.0)                  | 327 (48.7)                     | 0.121            |
| Smoking, n (%)                                                                                                                                                                                                                              | 74 (58.7)                  | 287 (42.9)                     | <b>0.001</b>     |
| <b>Imaging characteristics</b>                                                                                                                                                                                                              |                            |                                |                  |
| Baseline ASPECTS, median (IQR)                                                                                                                                                                                                              | 8 (7-9)                    | 8 (7-9)                        | 0.619            |
| <b>Collaterals</b>                                                                                                                                                                                                                          |                            |                                |                  |
| Good, n (%)                                                                                                                                                                                                                                 | 19 (15.0)                  | 113 (17.0)                     | 0.372            |
| Moderate, n (%)                                                                                                                                                                                                                             | 100 (78.7)                 | 530 (79.3)                     |                  |
| Poor, n (%)                                                                                                                                                                                                                                 | 8 (6.3)                    | 25 (3.7)                       |                  |
| <b>Intracranial occlusion location</b>                                                                                                                                                                                                      |                            |                                |                  |
| ICA, n (%)                                                                                                                                                                                                                                  | 18 (14.2)                  | 128 (19.2)                     | 0.271            |
| M1, n (%)                                                                                                                                                                                                                                   | 103 (81.1)                 | 519 (77.8)                     |                  |
| M2, n (%)                                                                                                                                                                                                                                   | 6 (4.7)                    | 20 (3.0)                       |                  |
| Non-stenotic carotid disease, n (%)                                                                                                                                                                                                         | 34 (27.0)                  | 174 (26.1)                     | 0.826            |
| <b>Treatment</b>                                                                                                                                                                                                                            |                            |                                |                  |
| Intravenous thrombolysis, n (%)                                                                                                                                                                                                             | 94 (74.0)                  | 376 (56.0)                     | <b>&lt;0.001</b> |
| Nerinetide, n (%)                                                                                                                                                                                                                           | 54 (42.5)                  | 332 (49.4)                     | 0.175            |
| ESUS indicates Embolic Stroke of Undetermined Source, NIHSS National Institute of Health Stroke Scale, mRS modified Rankin Scale, TIA Transient Ischemic Attack, ASPECTS Alberta Stroke Program Early CT Score, ICA Internal Carotid Artery |                            |                                |                  |
